# Supplementary material
Source: publisher figshare collection journal article supplement (https://gsapubs.figshare.com/ndownloader/files/23308169)
Supplement: Supplementary file 1 [file 23308169]

## Sheet: AHe Data
Data Repository Table DR1: AHe data
Sample	Latitude	Longitude	Diameter (μm)	U (ppm)	Th (ppm)	Sm (ppm)	eU (ppm)	Raw Age	Corrected Age	Error (+/- 1σ)	Excluded from Weighted Mean Age	Age/eU Correlation	Multiple Cooling Signals	Weighted Mean Age (Ma)	Sample Error (Ma) σ²
VEL-01												Y	N	173.012	1.54862
1	-28.8414	-67.1108		48.0873	2.7115	134.044	49.3518	68.3112	91.233	1.29123	Y
2	-28.8414	-67.1108		58.9537	2.52543	169.514	60.3414	112.753	163.723	2.38059	N
3	-28.8414	-67.1108		68.9593	2.50964	140.655	70.2076	106.257	165.294	2.42108	N
4	-28.8414	-67.1108		65.8928	3.51436	187.461	67.5963	157.245	199.718	2.79698	N
5	-28.8414	-67.1108		52.448	3.58628	155.955	54.0202	121.928	170.332	2.41929	N
VEL-02												N	N	175.753	2.99119
1	-28.8467	-67.0908		14.7988	3.89987	231.147	16.7978	152.811	211.317	2.97553	N
2	-28.8467	-67.0908		11.4337	4.40163	248.91	13.6335	89.7937	147.359	2.83201	N
3	-28.8467	-67.0908		5.90084	2.81546	211.961	7.55587	275.773	420.083	6.66113	implantation
4	-28.8467	-67.0908		4.99393	3.79826	246.038	7.03911	98.1728	164.932	4.61934	N
5	-28.8467	-67.0908		10.0592	5.8363	200.413	12.3669	107.952	176.371	4.48017	N
VEL-03												N	N	245.982	3.15467
1	-28.8458	-67.0756		70.5904	5.0752	258.645	72.9936	178.091	230.6	3.25818	N
2	-28.8458	-67.0756		4.29943	2.74075	201.346	5.88709	244.808	357.771	5.33965	implantation
3	-28.8458	-67.0756		74.7018	2.48134	238.418	76.4029	188.695	259.647	3.77285	N
4	-28.8458	-67.0756		78.212	4.848	267.075	80.6017	166.467	240.463	3.56116	N
5	-28.8458	-67.0756		84.4821	5.56135	330.361	87.3362	200.273	258.525	3.6839	N
VEL-04												Y	N	240.887	3.01949
1	-28.8489	-67.0615		74.402	5.90831	241.99	76.9219	193.451	236.643	3.30425	N
2	-28.8489	-67.0615		101.224	12.5188	268.644	105.416	176.461	249.766	3.50276	N
3	-28.8489	-67.0615		105.003	4.27684	264.545	107.247	156.202	235.626	3.38089	N
4	-28.8489	-67.0615		44.7017	8.09187	216.924	47.6148	200.018	242.663	3.76353	N
5	-28.8489	-67.0615		120.839	3.58779	282.574	123.007	213.255	313.211	5.07663	N
VEL-05												N	Y	167.241	1.3899
1	-28.8442	-67.036		66.3063	8.88095	344.021	70.0014	138.332	185.421	2.88117	N
2	-28.8442	-67.036		65.7363	15.6683	212.178	70.3999	98.883	141.6	2.17408	N
3	-28.8442	-67.036		64.0819	7.31141	234.927	66.8969	133.145	189.351	3.02916	N
4	-28.8442	-67.036		49.3489	7.16027	255.572	52.2255	148.45	181.568	2.78404	N
5	-28.8442	-67.036		90.2095	6.04499	171.837	92.4316	92.7857	160.393	2.5868	N
VEL-06												N	Y	Not Appropriate
1	-28.831	-67.0195	32.5324	68.3747	6.37095	217.642	70.8884	39.3635	67.4043	1.13726
2	-28.831	-67.0195	47.5444	79.557	16.7263	243.504	84.6154	271.987	384.239	6.01316	implantation
3	-28.831	-67.0195	35.7347	56.1635	8.33687	243.06	59.2567	155.281	250.376	3.96654
4	-28.831	-67.0195	45.1304	84.7504	9.45971	265.571	88.2122	37.9778	55.188	0.888556
5	-28.831	-67.0195	22.487	82.9107	5.3432	276.402	85.4601	32.59	74.7467	1.43125
6	-28.831	-67.0195	54.1964	66.0747	4.71709	318.026	68.6732	597.435	796.275	13.9324	implantation
7	-28.831	-67.0195	44.807	70.8587	6.62447	259.325	73.6276	67.5238	98.2522	1.6358
8	-28.831	-67.0195	28.0607	62.5505	5.72561	214.624	64.899	122.185	229.642	4.17342
9	-28.831	-67.0195	23.5782	37.8572	5.19643	247.701	40.2373	15.1149	33.1313	0.879609
10	-28.831	-67.0195	43.7814	71.9874	6.9647	203.034	74.5714	138.363	202.742	3.36236
AR14-22												Y	Y	Not Appropriate
1	-28.9728	-67.0027		14.8344	63.4051	72.8022	30.0134	261.042	352.787	5.34801	implantation
2	-28.9728	-67.0027		9.08933	19.017	104.05	14.0283	283.358	390.281	6.29052	implantation
3	-28.9728	-67.0027		7.29001	15.9714	84.5254	11.4246	556.273	670.476	10.2659	implantation
4	-28.9728	-67.0027		7.80566	13.7722	87.7421	11.4408	221.669	270.253	4.20328	implantation
5	-28.9728	-67.0027		13.0059	57.5722	86.1714	26.8828	341.55	435.799	6.37701	implantation
AR14-23												N	N	249.199	4.59252
1	-29.1048	-67.0344		135.308	27.1386	393.658	143.509	197.893	249.871	4.27704	N
2	-29.1048	-67.0344		106.499	23.2925	305.266	113.384	191.268	267.205	4.58325	N
3	-29.1048	-67.0344		90.6544	14.988	269.135	95.4265	231.595	294.799	5.063	N
4	-29.1048	-67.0344		86.0947	32.0568	304.843	95.0287	648.919	883.099	15.8396	implantation
5	-29.1048	-67.0344		80.9202	25.6874	243.066	88.0735	163.542	214.243	3.61636	N
AR14-24												N	N	169.17	1.61091
1	-29.2744	-67.1043		29.1559	13.6042	310.477	33.7985	126.493	173.287	2.52797	N
2	-29.2744	-67.1043		26.263	14.3332	329.558	31.1658	233.472	272.383	4.68812	implantation
3	-29.2744	-67.1043		13.1269	1.28071	269.003	14.6909	100.062	124.02	1.95583	N
4	-29.2744	-67.1043		29.1845	12.1486	307.266	33.4715	176.515	228.01	3.32013	N
5	-29.2744	-67.1043		56.0829	25.272	470.776	64.2092	160.124	186.053	3.87343	N
AR14-25												Y	N	Not Appropriate
1	-29.2649	-67.1126		18.0206	12.5408	436.844	23.0083	73.6852	123.827	3.07527	N
2	-29.2649	-67.1126		13.5696	10.822	392.482	17.9466	48.2866	72.6713	1.76233	N
3	-29.2649	-67.1126		29.9601	26.7194	629.751	39.1723	109.01	163.174	2.69576	N
4	-29.2649	-67.1126		30.4502	17.2979	617.893	37.402	107.974	155.727	2.74046	N
5	-29.2649	-67.1126		20.896	13.7969	566.716	26.788	71.8068	107.129	2.21054	N
AR14-26												N	N	218.613	2.55832
1	-29.3826	-66.9818		31.2703	4.18457	149.726	32.9532	171.061	210.502	3.64172	N
2	-29.3826	-66.9818		48.6116	4.846	155.442	50.4762	174.784	226.703	3.94078	N
3	-29.3826	-66.9818		25.1486	4.99088	93.1104	26.7541	183.103	211.637	3.58959	N
4	-29.3826	-66.9818		43.8228	4.78396	152.303	45.6581	173.632	221.581	3.36907	N
5	-29.3826	-66.9818		56.9594	4.13917	197.296	58.8552	156.92	222.952	3.4224	N
AR14-14												N	N	153.952	1.81506
1	-28.8227	-67.3129		29.1559	13.6042	310.477	33.7985	113.678	144.017	2.52461	N
2	-28.8227	-67.3129		26.263	14.3332	329.558	31.1658	127.381	152.825	2.56272	N
3	-28.8227	-67.3129		13.1269	1.28071	269.003	14.6909	120.771	162.596	2.80245	N
4	-28.8227	-67.3129		29.1845	12.1486	307.266	33.4715	121.348	159.455	2.95581	N
5	-28.8227	-67.3129		56.0829	25.272	470.776	64.2092	309.837	365.791	6.30567	implantation

## Sheet: AFT Raw Data
Data Repository Table DR1: AFT Raw Counting Data
Sample Name:	VEL-01
Zeta	348.6	27.1
Rho d	941311	1.84146
Nd	2949
Grain #	Ns	Ni	Ng	Dpar
1	78	185	100	2.74
2	59	147	100	2.259
3	31	77	60	2.33
4	33	130	100	1.92
5	88	295	100	2.24
6	77	295	100	2
7	28	91	50	2.09
8	35	71	100	2.53
9	55	205	100	2.49
10	15	38	100	2.37
11	36	115	100	2.3
12	39	143	40	2.27
13	30	117	50	2.11
14	24	95	100	2.27
15	33	109	50	2.71
16	40	160	80	2.24
17	50	221	100	2.74
18	49	173	100	2.24
19	13	54	100	2.51
20	32	119	100	2.13
Sample Name:	VEL-02
Zeta	348.6	27.1
Rho d	953460	1.84146
Nd	2949
Grain #	Ns	Ni	Ng	Dpar
1	24	77	80	1.84
2	26	74	100	1.57
3	27	93	100	1.55
4	34	74	100	1.7
5	25	53	100	1.71
6	23	97	100	1.47
7	15	48	60	1.8
8	30	84	100	1.71
9	28	68	100	1.65
10	22	66	100	1.87
11	32	109	100	1.71
12	51	115	100	1.77
13	27	49	50	1.66
14	31	53	100	1.69
15	13	68	100	1.7
16	23	64	100	1.64
17	9	34	100	1.62
18	36	94	100	1.74
19	22	50	100	1.68
20	26	40	100	1.81
Sample Name:	VEL-03
Zeta	348.6	27.1
Rho d	965610	1.84146
Nd	2949
Grain #	Ns	Ni	Ng	Dpar
1	54	168	100	2.11
2	91	311	100	2.14
3	29	104	100	2.29
4	70	188	100	1.91
5	79	183	100	2.14
6	13	56	100	1.58
7	20	39	100	1.82
8	63	195	80	1.99
9	56	112	100	1.7
10	7	18	100	1.79
11	87	194	100	1.91
12	35	115	100	1.84
13	52	178	100	2.12
14	88	254	100	1.94
15	79	240	100	1.86
16	21	49	100	2.07
17	101	283	100	2.15
18	44	66	100	1.6
19	82	183	100	1.98
20	47	98	100	2.08
Sample Name:	VEL-05
Zeta	348.6	27.1
Rho d	989910	1.84146
Nd	2949
Grain #	Ns	Ni	Ng	Dpar
1	53	184	100	1.98
2	57	161	100	1.68
3	64	153	100	1.74
4	33	89	100	1.55
5	55	103	100	1.87
6	49	115	100	2.12
7	40	114	100	1.82
8	35	156	100	1.81
9	58	178	100	1.67
10	66	169	100	2.37
11	14	24	100	1.87
12	34	75	100	1.8
13	42	130	100	1.76
14	62	224	100	2
15	53	133	100	1.78
16	28	105	100	1.8
17	33	116	100	1.95
18	37	130	100	1.86
19	55	147	100	1.97
20	20	59	100	1.77
Sample Name:	VEL-06
Zeta	348.6	27.1
Rho d	1.00206e+06	1.84146
Nd	2949
Grain #	Ns	Ni	Ng	Dpar
1	37	355	100	2.38
2	18	239	100	2.18
3	28	207	100	2.25
4	13	124	100	2.12
5	35	304	100	2.15
6	12	302	100	2.3
7	17	285	100	2.29
8	19	409	100	2.02
9	11	74	100	2.16
10	25	258	80	2.03
11	18	268	100	2.33
12	53	435	100	1.53
13	11	116	100	2.23
14	16	164	100	2.39
15	15	117	100	2.07
16	20	144	100	2
17	30	255	100	1.82
18	34	214	100	2
19	50	232	100	2.29
20	6	38	100	2.38
Sample Name:	AR14-23
Zeta	348.6	27.1
Rho d	1.29366e+06	1.84146
Nd	2949
Grain #	Ns	Ni	Ng	Dpar
1	33	121	50	2.16
2	39	78	50	2.54
3	69	184	100	2.46
4	52	166	100	2.1
5	15	42	100	2.4
6	52	207	100	2.79
7	76	219	100	2.5
8	45	168	100	2.48
9	25	73	100	2.37
10	49	153	100	2.81
11	38	123	100	2.62
12	38	99	100	2.48
13	18	85	100	2.57
14	28	51	40	2.34
15	7	47	100	2.4
16	38	152	50	1.98
17	23	66	100	2.67
18	27	82	50	2.8
19	38	107	50	2.84
20	12	43	100	2.58
Sample Name:	AR14-24
Zeta	348.6	27.1
Rho d	1.30581e+06	1.84146
Nd	2949
Grain #	Ns	Ni	Ng	Dpar
1	57	120	100	1.86
2	9	32	100	1.32
3	82	212	100	1.96
4	52	119	100	1.83
5	48	99	100	1.81
6	20	77	100	1.68
7	70	179	100	1.99
8	5	13	100	1.42
9	14	38	100	1.68
10	79	260	100	1.9
11	14	24	40	1.66
12	85	199	100	1.94
13	5	14	100	1.62
14	35	102	100	1.84
15	85	117	100	1.83
16	8	15	100	1.74
17	27	71	100	2
18	9	33	100	2.62
19	60	102	100	1.86
20	11	53	100	1.85
Sample Name:	AR14-25
Zeta	348.6	27.1
Rho d	1.31796e+06	1.84146
Nd	2949
Grain #	Ns	Ni	Ng	Dpar
1	17	44	100	1.5
2	26	61	100	1.99
3	16	57	100	2.3
4	19	59	100	2.27
5	9	31	100	2.12
6	10	42	100	2.17
7	15	95	100	2.6
8	15	54	100	2.47
9	44	141	100	2.59
10	21	100	100	2.19
11	8	48	50	2.3
12	28	101	100	2.48
13	16	82	100	2.57
14	27	103	100	2.28
15	19	42	40	2.29
16	13	67	70	2.62
17	13	38	100	2.48
18	12	50	100	2.18
19	14	36	100	1.97
20	54	226	100	2.47
Sample Name:	AR14-26
Zeta	348.6	27.1
Rho d	1.33011e+06	1.84146
Nd	2949
Grain #	Ns	Ni	Ng	Dpar
1	13	41	50	1.82
2	17	37	50	1.89
3	28	76	100	1.93
4	22	41	100	2.2
5	28	82	50	2.47
6	6	14	50	2.33
7	30	89	100	2.66
8	15	79	100	2.73
9	28	92	100	2.58
10	53	161	100	2.67
11	27	108	100	2.84
12	9	47	100	2.72
13	9	21	80	2.61
14	25	92	54	2.57
15	42	113	100	2.6
16	29	109	100	2.16
17	49	105	80	2.44
18	38	98	100	2.7
19	21	65	70	2.46
20	8	37	70	2.88
Sample Name:	AR14-04
Zeta	348.6	27.1
Rho d	1.14786e+06	1.84146
Nd	2949
Grain #	Ns	Ni	Ng	Dpar
1	44	118	100	2.1
2	61	151	100	1.84
3	18	106	100	2.4
4	14	37	100	2.39
5	25	70	100	2.06
6	36	97	100	2.08
7	17	51	100	1.95
8	20	81	100	2.15
9	30	111	100	2.14
10	42	133	100	2.18
11	18	74	49	2.05
12	20	108	100	1.96
13	54	128	100	2.24
14	25	48	100	1.91
15	20	75	100	2.03
16	11	20	50	2.24
17	73	177	100	2.22
18	34	97	100	2.23
19	31	84	100	2.21
20	47	111	100	2.09
Sample Name:	AR14-14
Zeta	348.6	27.1
Rho d	1.20861e+06	1.84146
Nd	2949
Grain #	Ns	Ni	Ng	Dpar
1	45	110	100
2	18	108	100
3	51	121	100
4	54	106	100
5	23	110	100
6	17	59	50
7	12	72	50
8	40	177	100
9	26	126	100
10	30	127	100
11	26	88	100
12	42	90	100
13	16	59	100
14	22	70	100
15	24	45	100
16	17	43	100
17	32	99	100
18	39	96	100
19	23	66	100
20	49	114	100
Sample Name:	AR14-15
Zeta	348.6	27.1
Rho d	1.22076e+06	1.84146
Nd	2949
Grain #	Ns	Ni	Ng	Dpar
1	26	65	100
2	110	271	100
3	51	132	100
4	46	217	100
5	29	44	100
6	15	65	50
7	35	121	50
8	26	47	100
9	17	49	100
10	17	39	100
11	29	60	100
12	27	74	100
13	17	48	100
14	19	40	100
15	13	49	100
16	38	118	100
17	37	74	100
18	53	138	100
19	16	49	100
20	59	160	100
Sample Name:	AR14-16
Zeta	356.602	30.6257
Rho d	2.17808e+06	1.46521
Nd	4658
Grain #	Ns	Ni	Ng	Dpar
1	5	29	40
2	7	44	50
3	3	11	70
4	5	11	49
5	13	53	60
6	7	41	40
7	7	28	50
8	13	55	40
9	7	44	50
10	18	60	32
11	10	26	70

## Sheet: AFT Lengths
VEL-01
length	<c	MdPar
11.49	53	2.74
10.41	54	2.74
13.74	68	2.74
12.59	49	2.74
11.01	52	2.59
11.03	50	2.59
10.2	60	2.59
11.66	68	2.59
8.9	81	2.33
11.14	59	2.33
10.01	64	2.33
9.54	58	2.33
8.02	73	2.24
9.75	70	2.24
10.34	58	2.24
10.16	68	2
10.51	66	2.6
5.49	77	2.6
10.17	78	2.6
11.17	54	2.53
9.47	61	2.53
10.75	65	2.49
11.01	78	2.49
11.85	83	2.49
11.06	43	2.49
11.04	75	2.49
12.11	74	2.49
11.81	53	2.49
9.22	64	2.49
9.79	85	2.49
9.67	54	2.3
12.3	52	2.3
5.75	65	2.3
9.86	51	2.3
12.61	63	2.3
12.26	60	2.3
9.06	56	2.3
12.77	26	2.3
9.55	33	2.27
11.84	81	2.27
9.53	78	2.27
10.64	53	2.27
11.12	70	2.11
11.11	57	2.11
7.88	66	2.11
11.16	34	2.53
13.12	75	2.53
8.36	66	2.53
9.96	61	2.27
9.79	65	2.45
10.16	72	2.45
12.24	50	2.45
14.05	69	2.24
10.42	52	2.24
13.13	73	2.24
10.41	62	2.24
12.06	12	2.24
10.03	80	2.24
7.84	60	2.74
13.15	72	2.74
13.09	69	2.74
10.12	67	2.74
11.22	68	2.74
12.2	70	2.74
5.14	65	2.24
11.42	56	2.06
9.66	62	2.06
9.04	78	2.51
10.99	87	2.51
11.4	78	2.51
8.57	47	2.51
12.94	44	2.07
12.56	47	2.2
13.51	79	2.2
11.97	40	2.2
10.4	82	2.2
11.74	81	2.03
8.82	73	2.03
9.58	47	2.1
9.99	84	2.1
7.03	77	1.74
10.79	77	1.74
6.95	48	1.82
13.31	40	1.82
11.7	60	1.82
6.61	62	1.82
10.87	74	1.92
11.77	73	1.92
6.95	69	1.92
11.23	57	1.94
10.16	60	1.94
9.16	44	1.94
8.85	56	1.94
9.2	68	1.94
9.86	75	1.94
12.07	70	1.86
11.03	81	1.86
10.44	72	1.86
10.76	56	1.86
9.74	62	2.24
11.71	73	2.24
9.92	60	2.24
VEL-02
length	<c	MdPar
13.64	85	1.57
12.65	65	1.57
12.24	68	1.6
11.53	52	1.96
9.63	85	1.96
11.76	73	1.71
12.84	74	1.71
12.01	66	1.71
9.14	33	1.72
9.17	45	1.72
10.1	78	1.72
11.22	67	1.72
13.56	72	1.72
11.9	70	1.69
11.07	82	1.69
13.94	71	1.69
14.65	54	1.69
11.75	69	1.69
9.33	48	1.69
12.29	75	1.47
12.74	57	1.8
11.25	73	1.8
14.68	44	1.55
12.51	40	1.55
11.16	47	1.55
12.9	47	1.82
13.27	69	1.82
11.49	50	1.82
14	37	1.82
11.8	63	1.82
11.25	36	1.82
13.54	70	1.82
13.09	69	1.82
11.56	76	1.82
10.15	78	1.71
10.73	86	1.77
14.16	86	1.77
12.89	68	1.61
12.72	50	1.61
12.6	50	1.73
14.34	46	1.58
12.1	57	1.58
12.57	40	1.58
11.74	88	1.7
14.65	33	1.49
10.98	62	1.64
12.19	70	1.64
13.38	79	1.7
11.79	57	1.87
11.99	51	1.87
12.02	58	1.74
11.07	49	1.74
10.92	53	1.68
10.31	89	1.76
11.78	66	1.76
13.53	30	1.76
11.38	50	1.76
13.77	40	1.81
13.89	79	1.46
13.75	51	1.46
8.95	68	1.46
10.88	57	1.46
12.67	57	1.44
12.2	49	1.82
11.72	53	1.82
11.64	63	1.82
13.75	83	1.87
VEL-03
length	<c	MdPar
13.25	71	1.94
12.19	4	1.94
13.46	49	2.11
16.22	49	2.11
11.21	59	2.11
9.85	66	2.11
10.47	65	2.11
10.18	64	2.11
9.71	85	2.11
11.27	43	2.11
11.21	55	2.11
7.31	61	2.11
11.54	82	2.11
10.5	50	2.11
10.19	78	2.11
13.93	45	2.11
11.6	59	2.11
12.05	57	2.11
12.08	70	2.11
10.1	61	2.11
11.58	80	2.11
9.96	45	2.11
10.18	75	2.11
13.75	45	2.11
8.34	62	2.14
11.34	71	2.14
12.42	49	2.14
12.3	71	2.14
12.61	86	2.14
11.92	66	2.14
11.43	72	2.14
10.53	54	2.29
12.67	72	2.29
8.3	75	2.29
11.69	49	2.29
10.86	49	2.29
10.04	72	2.29
9.45	55	2.29
10.6	72	1.91
12.05	52	1.91
12.01	54	1.91
9.5	56	1.91
7.43	47	1.91
10.94	53	2.14
8.09	51	2.14
10.03	72	2.14
11.16	16	2.14
11.41	67	2.14
11.19	40	2.14
10.23	73	2.14
11.45	45	2.14
10.79	52	2.14
11.12	67	1.88
11.61	50	1.83
11.44	52	1.83
7.48	69	1.83
9.44	60	1.83
8.7	84	1.83
10.24	67	1.83
11.97	48	1.83
9.57	79	1.83
9.26	46	1.83
12.14	76	1.83
9.77	66	1.83
9.73	72	1.96
11.72	57	1.96
10.19	64	1.96
10.07	68	1.96
11.53	66	1.96
11.27	67	1.96
12.34	63	1.96
11.7	70	1.96
12.97	37	1.96
10.88	66	1.96
9.98	89	1.96
12.87	70	1.96
10.44	85	2.05
12.75	59	2.05
11.11	76	2.05
11.9	70	1.89
10.71	76	1.97
10.24	72	1.97
11.95	39	1.97
9.66	66	1.82
9.54	62	1.82
10.38	63	1.82
12.21	48	1.82
10.24	74	1.82
12.33	85	1.82
10.2	60	1.82
12.77	75	1.82
8.49	71	1.82
9.92	79	1.82
8.93	87	1.99
11.31	40	1.99
12.54	84	1.99
7.8	68	1.99
12.2	81	1.99
12.43	47	1.99
11.68	73	1.99
VEL-05
length	<c	MdPar
13.26	78	1.98
14.55	15	1.98
11	56	1.68
11.47	75	1.68
5.63	81	1.68
12.78	78	1.68
13.05	74	1.74
13.85	88	1.74
10.1	62	1.74
8.77	81	1.74
11.69	60	1.74
5.51	60	1.74
7.44	40	1.74
12	12	1.68
9.07	76	1.68
11.74	79	1.68
9.07	50	1.68
13.76	67	1.68
8.9	77	1.68
9.41	61	1.68
10.89	76	1.79
8.63	58	1.79
9.56	77	1.87
11	58	1.87
12.98	62	1.87
10.67	57	1.87
10.63	56	1.87
9.34	62	1.87
10.22	58	1.87
12.46	75	1.87
10.21	66	2.12
10.17	72	2.12
12.02	51	1.65
10.85	61	1.65
13.52	59	2.12
11.41	72	2.12
11.42	48	2.12
11.19	67	2.12
8.33	65	2.12
12.56	69	2.12
11.13	58	1.82
12.7	89	1.81
9.89	89	1.81
12.9	88	1.81
7.09	47	1.81
11.14	46	1.81
7.77	87	1.86
9.92	80	1.67
10.81	57	2.37
10.08	63	2.37
9.44	76	2.37
13.45	33	2.37
10.79	82	2.37
11.89	82	1.87
9.35	72	1.94
12.89	65	1.94
9.33	71	1.71
11.18	48	1.71
15.34	72	1.76
12.5	65	1.76
12.49	70	1.76
9.83	58	2
11.09	44	2
12.71	40	2
13.2	60	2
8.08	64	2
9.7	79	2
9.41	54	2
7.65	72	1.78
11.35	74	1.78
12.52	60	1.8
10.97	51	1.8
8.85	60	1.8
10.18	73	1.8
11.74	65	1.8
9.46	79	1.8
6.87	78	1.49
10.37	65	1.49
8.85	45	1.49
11.37	58	1.69
10.88	44	1.69
9.11	83	1.69
10.3	82	1.95
11.24	58	1.65
10.76	59	1.65
11	61	1.65
9.43	53	1.65
11.36	73	1.86
9.34	62	1.86
13.15	67	1.89
11.95	29	1.89
11.81	73	1.95
11.89	81	1.95
12.95	59	1.95
9.12	69	1.95
11.06	54	1.97
11.31	65	1.97
10.36	82	1.97
9.49	53	1.97
12.36	68	1.97
VEL-06
length	<c	MdPar
7.75	55	2.38
8.91	55	2.38
13.93	58	2.18
11.19	71	2.16
11.67	57	2.16
10.57	58	2.25
11.46	57	2.12
12.91	47	2.12
9.28	22	2.15
13.13	60	2.15
10.37	38	1.88
7.27	64	2.32
8.41	71	2.32
9.54	58	2.32
11.61	55	2.32
8.53	55	2.32
14.31	73	2.29
6.6	39	2.29
10.57	37	2.54
10.45	35	2.54
11.93	55	2.02
8.79	41	2.37
7.7	72	2.37
9.49	53	2.4
11.71	82	2.4
9.99	55	2.4
10.4	49	2.36
12.23	26	2.36
10.49	64	2.16
10.41	78	2.2
10.82	69	2.2
13.42	76	2.33
13.77	60	2.33
13.44	25	2.23
6.6	22	2.23
13.17	72	2.23
10.44	44	2.23
8.88	34	2.26
10.78	64	2.26
13.47	65	2
8.47	83	1.82
9.4	79	2.1
11.71	46	2.1
7.99	65	2.1
8.77	8	2.1
8.91	90	2.12
9.64	29	2.12
11.81	68	2.29
8.42	50	2.29
12.58	78	2.29
7.21	76	2.29
12.84	61	2.38
13.18	64	2.38
9.86	44	2.38
8.08	32	2.38
8.57	35	2.38
12.18	61	2.38
11.02	89	2.3
10.36	54	2.3
11.1	69	2.3
9.86	69	2.3
8.3	49	2.3
10.14	39	2.26
14.28	34	2.26
10.86	77	2.26
11.38	76	2.2
11.81	62	2.2
7.8	73	1.9
11.94	53	1.91
10.61	61	1.91
9.78	74	2.09
12.25	42	2.09
11.49	44	2.15
10.71	27	2.15
9.85	65	2.15
AR14-23
length	<c	MdPar
9.78	60	2.16
11.38	37	2.16
7.23	57	2.16
7.2	59	2.16
10.16	74	2.16
6.43	63	2.16
12.25	75	2.54
11.28	65	2.54
13.32	54	2.46
12.28	72	2.46
10.47	56	2.46
12.59	69	2.46
13.66	49	2.46
13.15	71	2.1
12.6	43	2.1
13.71	49	2.1
11.03	70	2.1
10.68	79	2.1
10.52	57	2.1
11.26	61	2.4
12.21	57	2.4
10.89	70	2.4
13.55	56	2.4
12.86	82	2.4
14.32	68	2.4
14.22	70	2.76
11.51	39	2.76
13.3	77	2.76
10.99	75	2.76
12.26	77	2.5
13.61	55	2.5
11.37	59	2.5
13.44	73	2.5
11.32	46	2.5
12.74	47	2.5
11.64	48	2.5
12.7	62	2.5
11.22	53	2.5
12.61	43	2.5
11.89	74	2.5
12.93	27	2.5
11.06	59	2.5
11.53	85	2.5
13.55	65	2.5
12.93	76	2.48
10.54	72	2.48
8.42	63	2.48
13.83	75	2.94
11.41	56	2.94
10.26	66	2.94
11.5	67	2.94
13.21	65	2.94
13.68	47	2.94
12.86	51	2.37
11.57	57	2.81
12.55	77	2.81
13.97	85	2.81
13.55	69	2.81
13.04	81	2.81
11.06	83	2.62
15.83	74	2.62
13.38	57	2.62
14.01	58	2.62
13.62	56	2.62
9.79	66	2.62
13.09	37	2.62
14.56	67	2.62
14.62	15	2.62
13.1	80	2.62
14.73	18	2.48
12.27	74	2.57
11.75	69	2.57
12.03	52	2.57
12.46	86	2.34
14.68	48	2.34
12.7	66	2.34
13.33	69	2.4
15.03	79	2.4
13.6	35	2.4
12.08	76	2.4
13.48	65	1.98
11.17	51	1.98
12.5	62	1.98
8.21	47	1.98
11.07	75	2.67
9.2	55	2.67
14.34	74	2.67
12.73	76	2.8
14.9	48	2.8
13.2	57	2.8
10.43	47	2.8
12.65	56	2.8
11.96	82	2.84
10.76	59	2.84
12.73	71	2.28
11.32	80	2.28
12.2	54	2.28
12.91	87	2.28
13.18	53	2.71
13.39	70	2.71
11.36	78	2.71
AR14-24
10.54	74	1.86
10.54	46	1.86
10.09	46	1.86
16.09	54	1.86
7.22	52	1.86
12.08	79	1.86
11.37	27	1.96
10.36	82	1.96
11.2	63	1.96
8.79	78	1.96
13.32	30	1.96
13.66	54	1.83
11.85	71	1.83
11.74	74	1.83
11.32	62	1.83
13.17	32	1.83
11.67	53	1.83
10.29	78	1.83
11.38	48	1.83
13.72	87	1.68
10.21	45	1.68
12.66	74	1.99
13.67	74	1.99
12.58	39	1.99
10.17	64	1.99
11.56	68	1.9
12.58	62	1.9
11.42	67	1.9
9.39	55	1.9
13.97	73	1.9
13.08	81	1.9
11.91	50	1.9
12.2	80	1.9
9.45	57	1.9
12	40	1.9
12.1	76	1.9
13.41	73	1.9
10.49	57	1.9
13.93	40	1.66
14	50	1.66
12.94	84	1.66
12.41	44	1.66
13.2	57	1.66
14.58	36	1.66
10.93	73	1.66
12.08	43	1.66
10.09	88	1.84
12.84	25	1.84
10.59	86	1.84
10.96	52	1.84
14.83	59	1.84
11.51	74	1.84
13.85	85	1.83
12.83	66	1.83
10.17	53	1.83
12.44	59	1.83
11.5	65	1.83
10.09	69	1.83
11.35	63	1.71
12.73	76	2.62
12.6	65	1.86
10.01	56	1.86
15.13	78	1.86
11.88	78	1.86
9.23	83	1.86
11.62	44	1.87
12.36	56	1.87
7.82	54	1.87
10.07	85	1.87
12.27	46	1.87
12.07	73	2.37
10.34	69	2.37
12.22	48	1.95
10.71	49	1.95
9.34	65	1.95
AR14-25
length	<c	MdPar
10.95	53	1.5
9.05	28	1.83
10.96	71	2.3
11.62	25	2.3
16.15	64	2.3
15.05	38	2.12
17.06	41	2.12
11.55	62	2.12
12.56	75	2.12
6.59	84	2.17
11.55	41	2.6
12.56	82	2.59
12.21	54	2.59
10.38	56	2.59
10.43	77	2.59
12.12	59	2.59
11.71	51	2.59
8.1	79	2.14
10.61	58	2.14
14.17	68	2.14
11.31	67	2.15
9.23	55	2.15
12.72	63	2.3
15.33	68	2.48
12.99	80	2.48
7.45	62	2.48
11.68	71	2.25
13.21	73	2.45
13.38	47	2.45
10.33	83	2.45
9.05	72	2.29
10.97	74	2.29
9.08	65	2.29
8.25	45	2.18
13.47	44	2.47
9.75	57	2.47
12.9	14	2.01
9.04	46	2.5
10.51	69	2.5
12.21	19	2.5
10.65	53	2.55
10.67	80	2.55
13.9	46	2.37
10.25	45	2.45
11.71	75	2.45
9.01	60	2.45
10.73	54	2.44
6.8	46	2.44
11.65	8	2.44
10.55	63	2.03
AR14-26
length	<c	MdPar
12.28	64	1.82
12.81	39	1.89
10.48	68	1.89
12.53	71	1.93
12.92	81	1.93
10.22	90	2.2
11.15	60	2.2
12.03	42	2.19
8.14	59	2.47
9.65	57	2.47
11.9	70	2.66
9.82	68	2.66
10.94	57	2.66
11.32	64	2.73
11.22	63	2.73
10.75	41	2.73
12.57	20	2.58
10.92	90	2.67
11.71	60	2.67
7.91	80	2.67
9.61	63	2.67
12.02	67	2.67
11.72	78	2.67
11.96	32	2.67
10.82	58	2.67
11.72	65	2.67
10.54	88	2.67
14.44	29	2.84
12.75	74	2.84
11.21	59	2.84
10.96	80	2.84
12.75	33	2.84
12.78	61	2.84
12.54	41	2.84
11.25	67	2.84
9.89	76	2.84
14.83	32	2.84
11.29	65	2.84
11.57	68	2.84
12.5	58	2.84
13.37	38	2.84
12.85	46	2.72
10.79	62	2.57
9.72	79	2.57
11.29	62	2.57
12.89	56	2.57
9.8	52	2.57
12.69	57	2.57
10.29	75	2.95
14.23	73	2.95
10.27	65	2.95
11.83	87	2.95
10.6	51	2.6
11.18	45	2.6
10.5	88	2.6
12.15	75	2.16
9.33	60	2.44
11.65	60	2.44
11.12	23	2.44
11.49	59	2.7
13.67	56	2.7
10.66	69	2.7
12.79	43	2.7
8.53	69	2.7
10.79	69	2.7
12.15	60	2.7
13.39	70	2.7
10.75	74	2.7
9.53	72	2.7
14.38	54	2.46
12.01	80	2.46
10.13	56	2.46
10.46	54	3.34
12.73	81	3.34
10.29	79	3.34
11.67	82	3.34
13.31	86	3.34
12.32	60	3.34
12.85	78	3.34
11.2	89	3.34
12.18	80	2.72
14.16	62	2.72
12.13	63	2.72
12.09	45	2.72
11.43	73	2.72
11.74	65	2.72
12.48	49	2.72
AR14-04
length	<c	MdPar
8.3	61	1.8
9.38	88	1.8
11.47	87	1.8
10.7	64	1.8
9.84	60	1.8
12.1	57	2.1
15.49	51	1.84
12.27	55	1.84
10.66	79	1.84
10.26	81	1.84
10.93	77	2.4
14.91	48	2.4
9.81	73	2.4
13.87	47	2.4
12.62	71	2.06
11.45	81	2.25
12.39	37	2.08
12.37	39	2.08
12.73	65	2.08
11.82	77	2.08
8.93	58	2.08
8.3	64	1.95
11.01	61	2.15
14.08	78	2.15
10.4	52	2.15
14.47	60	2.15
12.99	59	2.15
11.25	85	2.15
13.71	62	2.15
12.61	82	2.21
10.11	59	2.21
9.87	65	2.21
12.4	68	2.14
10.7	62	2.14
8.99	45	2.18
14.36	59	2.18
12.52	73	2.18
8.81	81	2.18
10.51	79	2.18
12.86	41	2.2
13.09	49	2.2
9.29	54	2.05
13.13	33	1.96
12.05	65	1.96
12.02	59	1.96
9.74	73	2.08
12.78	63	2.08
13.67	65	2.24
10.21	71	2.24
10.78	86	2.24
13.02	80	1.86
14.6	61	2.05
11.23	61	2.05
9.99	51	2.05
9.64	66	2.05
9.08	65	2.05
12.11	76	2.05
12.81	84	2.05
12.65	65	1.91
9.9	55	2.22
12.37	76	2.22
15.06	86	2.22
13.48	51	2.22
11.38	63	2.22
11.41	82	2.22
11.85	41	2.23
11.23	61	2.23
12.67	70	2.09
13.09	47	2.09
11.11	74	1.96
10.72	88	1.96
12.19	60	1.96
12.38	39	1.96
10.32	58	1.91
9.56	69	1.99
11.74	48	1.99
9.5	64	1.99
10.7	63	1.91
13.73	67	1.91
11.14	63	1.91
12.61	54	1.91
